# Supplementary material for: Effects of Variations in the Chemical Composition of Individual Rice Grains on the Eating Quality of Hybrid Indica Rice Based on Near-Infrared Spectroscopy
Source: MDPI journal article supplement (doi:10.3390/foods11172634), 2022-08-30
Supplement: s1 [file s1]

**Table S1.** Summary of eating quality regression models of hybrid indica rice using physicochemical indicators<sup>1</sup>, and variations in single-grain composition and physicochemical indicators<sup>2</sup>.

| 1          | Unstandardized coefficients |                | R <sup>2</sup> | VIF of collinearity | 2                | Unstandardized coefficients |                | R <sup>2</sup> | VIF of collinearity |
|------------|-----------------------------|----------------|----------------|---------------------|------------------|-----------------------------|----------------|----------------|---------------------|
|            | B                           | Standard error |                |                     |                  | B                           | Standard error |                |                     |
| (Constant) | 91.088                      | 8.146          | <b>0.657</b>   | 1.269               | (Constant)       | 116.307                     | 6.621          | 0.85           |                     |
| AC         | -1.126                      | 0.132          |                |                     | AC               | -0.868                      | 0.093          |                |                     |
| PC         | -2.095                      | 0.678          |                |                     | PC               | -1.886                      | 0.460          |                |                     |
| ASV        | 2.735                       | 0.491          |                |                     | ASV              | 1.714                       | 0.340          |                |                     |
| GC         | 0.127                       | 0.036          |                |                     | GC               | 0.072                       | 0.025          |                |                     |
|            |                             |                |                |                     | Variance of SGAC | -1.338                      | 0.116          |                |                     |
|            |                             |                |                |                     | Variance of SGPC | 27.962                      | 10.069         |                |                     |
|            |                             |                |                |                     | Range of SGPC    | -0.779                      | 1.630          |                |                     |
|            |                             |                |                |                     | QD of SGPC       | -16.083                     | 5.080          |                |                     |

Dependent variable: taste value

**Table S2.** The population standard deviation of the SGAC and SGPC models based on the NIRS single-grain platform.

| Sample NO.                            | 1     | 2     | 3    | 4     | 5     | 6     | 7    | 8     | 9     | 10    |
|---------------------------------------|-------|-------|------|-------|-------|-------|------|-------|-------|-------|
| Predicted SGAC for 10 repetitions (%) | 10.37 | 10.79 | 5.89 | 2.89  | 21.32 | 14.32 | 7.65 | 22.45 | 10.56 | 17.95 |
|                                       | 9.73  | 7.31  | 5.79 | -1.52 | 20.10 | 15.05 | 4.46 | 22.48 | 13.93 | 16.74 |
|                                       | 13.27 | 9.72  | 5.60 | 2.81  | 19.97 | 14.73 | 7.35 | 19.35 | 13.94 | 14.99 |
|                                       | 13.12 | 8.51  | 9.58 | -0.49 | 20.88 | 14.76 | 5.00 | 20.02 | 11.20 | 13.25 |
|                                       | 14.16 | 9.77  | 6.34 | 2.44  | 22.86 | 14.78 | 0.09 | 19.74 | 11.03 | 15.68 |
|                                       | 11.41 | 12.96 | 6.13 | -0.72 | 20.08 | 10.55 | 2.28 | 20.01 | 19.41 | 14.86 |
|                                       | 12.35 | 11.33 | 6.45 | -0.75 | 22.45 | 14.25 | 3.45 | 20.61 | 11.95 | 16.77 |
|                                       | 16.14 | 7.17  | 6.88 | 0.24  | 19.21 | 13.05 | 4.49 | 20.95 | 12.12 | 11.60 |
|                                       | 14.11 | 7.33  | 7.27 | -2.31 | 22.47 | 13.37 | 4.79 | 21.48 | 12.19 | 17.12 |
|                                       | 13.76 | 8.43  | 6.98 | 2.30  | 23.92 | 12.82 | 1.70 | 19.31 | 12.32 | 17.25 |
| SD (%)                                | 1.93  | 1.94  | 1.15 | 1.95  | 1.53  | 1.38  | 2.36 | 1.18  | 2.55  | 1.99  |
| Population standard deviation (%)     |       |       |      |       | 1.9   |       |      |       |       |       |
| Predicted SGPC for 10 repetitions (%) | 8.00  | 7.63  | 7.76 | 8.08  | 9.05  | 7.91  | 7.98 | 9.06  | 9.23  | 7.09  |
|                                       | 7.73  | 7.75  | 7.97 | 7.94  | 9.22  | 8.28  | 7.64 | 9.11  | 9.19  | 6.92  |
|                                       | 7.88  | 7.90  | 7.75 | 8.01  | 9.18  | 7.89  | 7.76 | 8.94  | 9.67  | 7.21  |
|                                       | 7.49  | 8.08  | 8.03 | 7.91  | 9.27  | 8.34  | 7.80 | 8.60  | 9.47  | 6.92  |
|                                       | 7.61  | 7.79  | 7.91 | 7.94  | 9.41  | 8.66  | 8.09 | 9.24  | 9.69  | 7.09  |
|                                       | 7.68  | 7.56  | 7.94 | 8.28  | 9.11  | 8.38  | 8.45 | 8.86  | 9.02  | 6.91  |
|                                       | 7.68  | 7.96  | 7.96 | 8.40  | 9.41  | 8.13  | 7.77 | 8.75  | 9.37  | 6.65  |
|                                       | 7.43  | 7.99  | 7.57 | 8.25  | 9.50  | 7.79  | 8.15 | 8.81  | 9.22  | 7.03  |
|                                       | 8.03  | 7.62  | 7.72 | 8.13  | 8.98  | 8.02  | 7.61 | 9.09  | 9.10  | 7.14  |
|                                       | 8.03  | 7.96  | 7.59 | 8.05  | 9.36  | 8.29  | 8.17 | 8.62  | 9.26  | 6.85  |
| SD (%)                                | 0.22  | 0.18  | 0.17 | 0.17  | 0.17  | 0.27  | 0.27 | 0.22  | 0.23  | 0.16  |
| Population standard deviation (%)     |       |       |      |       | 0.2   |       |      |       |       |       |
